# Supplementary material for: Competition in Service Industries with Segmented Markets
Source: Atypon-hosted journal article supplement (doi:10.1287/mnsc.1080.0946), 2009-01-06
Supplement: mnsc.1080.0946-sm-ec.pdf [file mnsc.1080.0946-sm-ec.pdf]

**e - c o m p a n i o n**

ONLY AVAILABLE IN ELECTRONIC FORM

Electronic Companion—“Competition in Service Industries with  
Segmented Markets” by Gad Allon and Awi Federgruen,  
*Management Science*, DOI 10.1287/mnsc.1080.0946.

---

## Appendix EC.1: Online Appendix

### Proof of Proposition 4.1:

(a) Let  $S_i^{*c}$  denote the largest maximizing set in  $E^1 \cup E^2$  in (4) for  $\mu_i^{*c}$ . Decompose  $S_i^{*c} = S_i^1 \cup S_i^2$ ,  $S_i^1 \subseteq E^1$ ,  $S_i^2 \subseteq E^2$ . Let  $\alpha = \sum_{m \in S_i^1} \frac{\lambda_i^m}{(\nu^m)^2} / \sum_{m \in S_i^1 \cup S_i^2} \frac{\lambda_i^m}{(\nu^m)^2}$ .

$$\mu_i^{*c} = \sum_{l \in S_i^1 \cup S_i^2} \frac{\lambda_i^l}{\nu^l} + \frac{1}{\alpha W_i(S_i^1) + (1-\alpha)W_i(S_i^2)} \leq \sum_{l \in S_i^1} \frac{\lambda_i^l}{\nu^l} + \frac{1}{W_i(S_i^1)} + \sum_{l \in S_i^2} \frac{\lambda_i^l}{\nu^l} + \frac{1}{W_i(S_i^2)} \leq \mu_i^{*1} + \mu_i^{*2}$$

where the equality follows from simple algebra, and the first inequality since  $\frac{1}{\alpha W_i(S_i^1) + (1-\alpha)W_i(S_i^2)} \leq \frac{1}{W_i(S_i^1)} + \frac{1}{W_i(S_i^2)}$  as can be verified by multiplying both sides by  $(\alpha W_i(S_i^1) + (1-\alpha)W_i(S_i^2))$ . The last inequality follows directly from (4).

(b) Follows from part (a) by induction, choosing  $E^1 = \{1, \dots, J-1\}$ , and  $E^2 = \{J\}$ .

(c) Monotonicity and joint convexity are easily verified: for given demand rates, the lower bound for any given set  $S \subseteq E$ , is jointly convex, as the composition of a jointly convex function and a linear function. Moreover, the maximum of  $2^J - 1$  jointly convex functions is convex.

(d) Monotonicity is straightforward. Let  $\widehat{\mu}_i^*$  denote the capacity required when increasing  $\lambda_i^l$  to  $\widehat{\lambda}_i^l > \lambda_i^l$ , leaving everything else unchanged. The demand rate  $\widehat{\lambda}_i^l$  may be viewed as the aggregate arrival rate of *two* classes, class  $l$  with rate  $\lambda_i^l$ , and  $\widehat{l}$  with  $\widehat{\lambda}_i^l - \lambda_i^l$ , both with waiting time standard  $w_i^l = w_i^{\widehat{l}}$ . As in Corollary 4.2(d), let  $r_2$  be the priority rule associated with the enlarged system and its capacity level  $\widehat{\mu}_i^*$ . If  $\widehat{\mu}_i^* < \mu_i^*$ , let  $\widehat{r}$  denote the modification of this rule, obtained by giving class  $\widehat{l}$  the lowest priority in any of the absolute priority rules over which  $r_2$  randomizes. Clearly, the expected waiting time for all of the original classes  $\{1, \dots, J\}$  do not increase when switching from  $r_2$  to  $\widehat{r}$  and therefore are at or below the required standard  $w_i^l, l \in E$ . This contradicts  $\mu_i^* > \widehat{\mu}_i^*$ .

If class  $l$  is residual at firm  $i$ , the marginal capacity cost is clearly 0. Otherwise, the existence of  $\frac{\partial \mu_i^*}{\partial \lambda_i^l}$  follows from the fact that  $\mu_i^* = \sum_{l \in S_i^*} \frac{\lambda_i^l}{\nu^l} + \frac{1}{W_i(S_i^*)}$  for the *same* set  $S_i^*$  in neighborhood of the demand volumes of  $\lambda_i^l$ . The expression for  $\frac{\partial \mu_i^*}{\partial \lambda_i^l}$  follows from simple calculus; the conditions about the marginal capacity value being larger or smaller than the expected amount of work, a customer of class  $l$  is adding to the system are immediate from the sign of the second term to the right of (9).

(e) Since the same bottleneck set  $S_i^*$  prevails for all values  $\{\lambda_i^l\}$ , if class  $l$  is residual for some demand volume  $(\lambda_i^l)^0$ , it is residual for all possible values, and the capacity  $\mu_i^*$  is invariant with respect to  $\lambda_i^l$ . Otherwise, the assumption ensures that for the same set  $S_i^*$ ,  $\mu_i^* = \sum_{l \in S_i^*} \frac{\lambda_i^l}{\nu^l} + \frac{1}{W_i(S_i^*)}$  for *all* values of  $\lambda_i^l$ . Differentiating (7) with respect to  $\lambda_i^l$ , we obtain

$$\frac{\partial^2 \mu_i^*}{\partial (\lambda_i^l)^2} = \frac{2w_i^l (b_i^l)^2}{(\nu^l)^2 \left(\widetilde{\lambda}_S^w\right)^3} \left( \sum_{m \in S} \frac{\lambda_i^m w_i^m \nu^m}{(\nu^m)^2 \nu^l} - w_i^l \nu^l \sum_{m \in S} \frac{\lambda_i^m}{(\nu^m)^2 \nu^l} \right) \quad (\text{EC.1})$$

The concavity and convexity properties follow readily. ■

**Proof of Corollary 4.2:** For  $\mu_i^0 = \mu_i^*$ , define  $\overline{W}_i$  and  $\mathcal{W}_i$  as in the proof of Lemma 4.1, and the set function  $b_i(\cdot)$  as in (2). Part (a) is immediate from (4). Part (b): Assume the maximum in (4) is achieved for two sets  $S, T$ . Note that  $b_i(S \cup T) \leq \sum_{l \in S \cup T} \rho_i^l w_i^l = \sum_{l \in S} \rho_i^l w_i^l + \sum_{l \in T} \rho_i^l w_i^l - \sum_{l \in S \cap T} \rho_i^l w_i^l \leq b_i(S) + b_i(T) - b_i(S \cap T) \leq b_i(S \cup T)$ , where the first two inequalities follow from  $w_i \in \mathcal{W}_i$  and the last inequality from the supermodularity of the  $b_i$  function. Thus  $\sum_{l \in S \cup T} \rho_i^l w_i^l = b_i(S \cup T)$ , i.e., the maximum in (4) is achieved for  $S \cup T$ . Part (c): Since  $w = \{w_i^l, l \in E\} \in \overline{W}_i$ , the claim follows, as shown in the proof of Lemma 4.1. Part(d):  $w \notin \overline{W}_i$ , but the proof of Lemma 4.1 shows that a vector  $x \geq 0$  exists such that  $w' = w - x \in \overline{W}_i$ .  $x^l = 0$  for  $l \in S^*$ , since  $b_i(S_i^*) = \sum_{l \in S_i^*} \rho_i^l w_i^l \geq \sum_{l \in S_i^*} \rho_i^l (w_i^l - x^l) \geq b_i(S_i^*)$ , where the first equality follows from the fact that  $\mu_i^*$  is achieved at  $S^*$ , and the last inequality from  $w \in \mathcal{W}_i$ . The optimality of rules  $r_1$  and  $r_2$  follows again from the proof of Lemma 4.1 and the fact that  $S$  and  $T$  achieve the maximum. Since, by Carathéodory's Theorem (see e.g. Bazaraa and Shetty (1979)), each point in a  $J$ -dimensional polyhedron can be written as a convex combination of no more than  $J + 1$  extreme points, at most  $J + 1$  absolute priority rules needed to be randomized. ■

**Proof of Proposition 5.1:**

(a) Let  $A^l$  denote the  $N \times N$  matrix with  $A_{ii}^l = 2b_i^l$  and  $A_{ij}^l = -\beta_{ij}^l, i \neq j$ . By (D) it is easily verified that  $A^l$  is invertible with  $(A^l)^{-1} > 0$  (see e.g. Bernstein and Federgruen (2002)). Let  $\kappa^l$  and  $\kappa^{Dl}$  be the

$N$ -vectors with  $\kappa_i^{Dl} = a_i^l(w_i^l) - \sum_{j \neq i} \alpha_{ij}^l(w_j^l) + b_i^l(c_i^l + \frac{\gamma_i}{\nu^l})$  and  $\kappa_i^l = \kappa_i^{Dl} + \frac{\gamma_i b_i^l}{\nu^l} \frac{\sum_{m \in S_i^*} \frac{\lambda_i^m w_i^m}{\nu^m \nu^l} - w_i^l \tilde{\lambda}_s}{\left(\sum_{m \in S_i^*} \frac{\lambda_i^m w_i^m}{\nu^m \nu^l}\right)^2} \cdot p^*$  satisfies (17), which in matrix form, by (6) can be written as  $A^l(p_1^l, \dots, p_N^l)^T = \kappa^l$ . Applying Theorem 5.1 to the setting in which dedicated service is provided at all firms it follows that the equilibrium  $p^D$  satisfies (17) with the second term to the left replaced by 0. Thus,  $(A^l)(p_1^{Dl}, \dots, p_N^{Dl})^T = \kappa^{Dl}$  and  $(p_1^*, \dots, p_N^*) = (A^l)^{-1} \kappa^l \geq (A^l)^{-1} \kappa^{Dl} = (p_1^{Dl}, \dots, p_N^{Dl})$ , where the inequality follows  $(A^l)^{-1} \geq 0$  and  $\kappa^l \geq \kappa^{Dl}$  since  $w_i^l \nu^l \geq W_i(S_i^*), \forall i = 1, \dots, N$ .

(b) Analogous to the proof of part(a) except that  $\kappa^l < \kappa^{Dl}$ .

(c) Analogous to the proof of part (a) replacing  $\kappa^l$  by  $\hat{\kappa}^l$  where  $\hat{\kappa}_1^l = \kappa_1^l$ , and  $\hat{\kappa}_i^l = \kappa_i^{Dl}, \forall i = 2, \dots, N$

**Proof of Theorem 5.2:** With a fixed price vector  $p$ , the profit function  $\pi_i$  can be written as  $\pi_i(p, w) = \min_{S \subseteq E} \pi_i^S(p, w)$  where

$$\pi_i^S(p, w) = \sum_{m \in E} (p_i^m - c_i^m) \lambda_i^m(p^m, w^m) - \gamma_i \left( \sum_{m \in S} \frac{\lambda_i^m(p^m, w^m)}{\nu^m} + \frac{\sum_{m \in S} \frac{\lambda_i^m(p^m, w^m)}{(\nu^m)^2}}{\sum_{m \in S} \frac{\lambda_i^m(p^m, w^m)}{\nu^m} w_i^m} \right)$$

As in the proof of Theorem 5.1, it suffices to show that each of the functions  $\pi_i^S$  is jointly concave in  $(w_i^1, \dots, w_i^J)$ , so that  $\pi_i$ , as the minimum of these functions, is jointly concave. We, again, show concavity of  $\pi_i^S$  by verifying that its Hessian has negative diagonal elements and is diagonally dominant. To that end, let  $\tilde{\lambda}_S^W = \sum_{m \in S} \frac{\lambda_i^m w_i^m}{\nu^m}$ . If  $l \notin S$ ,  $\frac{\partial \pi_i^S}{\partial w_i^l} = a_i^l(p_i^l - c_i^l - \frac{\gamma_i}{\nu^l})$  and thus for all  $k \in E$ ,  $\frac{\partial^2 \pi_i^S}{\partial w_i^l \partial w_i^k} = 0$ , and  $\frac{\partial^2 \pi_i^S}{\partial (w_i^l)^2} = a_i^{l''}(p_i^l - c_i^l - \frac{\gamma_i}{\nu^l}) \leq 0$ . If  $l \in S$ , we obtain after some algebra,

$$\begin{aligned} \frac{\partial \pi_i^S}{\partial w_i^l} &= a_i^l \left( p_i^l - c_i^l - \frac{\gamma_i}{\nu^l} \right) - \gamma_i a_i^l \frac{\frac{1}{(\nu^l)^2} \sum_{m \in S} \frac{\lambda_i^m w_i^m}{\nu^m} - \frac{w_i^l}{\nu^l} \tilde{\lambda}_s}{\left(\tilde{\lambda}_S^w\right)^2} + \gamma_i \frac{\frac{w_i^l}{\nu^l} \tilde{\lambda}_s}{\left(\tilde{\lambda}_S^w\right)^2} \\ &= a_i^l \left( p_i^l - c_i^l - \gamma_i \frac{\partial \mu_i^*}{\partial \lambda_i^l} \right) + \gamma_i \nu^l \frac{\lambda_i^l (\nu^l)^2}{\sum_{m \in S} \lambda_i^m / (\nu^m)^2} \frac{1}{W_i^2(S)} \end{aligned} \quad (\text{EC.2})$$

$$\frac{\partial^2 \pi_i^S}{\partial (w_i^l)^2} = a_i^{l''} \left( p_i^l - c_i^l - \frac{\gamma_i}{\nu^l} \right) - \frac{\gamma_i a_i^{l''}}{\nu^l} \frac{\sum_{m \in S} \frac{\lambda_i^m}{\nu^m} \left( \frac{w_i^m}{\nu^l} - \frac{w_i^l}{\nu^m} \right)}{\left(\tilde{\lambda}_S^w\right)^2} \quad (\text{EC.3})$$

$$\begin{aligned}
& + 2\gamma_i \left(a_i^{l'}\right)^2 \frac{w_i^l}{(\nu^l)^2} \frac{\sum_{m \in S} \frac{\lambda_i^m}{\nu^m} \left(\frac{w_i^m}{\nu^l} - \frac{w_i^l}{\nu^m}\right)}{\left(\widetilde{\lambda}_S^w\right)^3} \\
& - \gamma_i a_i^{l'} \frac{\left(\sum_{m \in S} \frac{\lambda_i^m w_i^m}{\nu^m}\right) \left(\frac{1}{(\nu^l)^2} \frac{\lambda_i^l}{\nu^l} - \frac{1}{\nu^l} \widetilde{\lambda}_s\right) - 2 \frac{\lambda_i^l}{(\nu^l)^2} \sum_{m \in S} \frac{\lambda_i^m}{\nu^m} \left(\frac{w_i^m}{\nu^l} - \frac{w_i^l}{\nu^m}\right)}{\left(\widetilde{\lambda}_S^w\right)^3} \\
& + \gamma_i a_i^{l'} \frac{\left(\sum_{m \in S} \frac{\lambda_i^m w_i^m}{\nu^m}\right) \left(\frac{1}{(\nu^l)^2} \frac{\lambda_i^l}{\nu^l} + \frac{1}{\nu^l} \widetilde{\lambda}_s\right) - 2 \frac{\lambda_i^l w_i^l}{(\nu^l)^2} \widetilde{\lambda}_s}{\left(\widetilde{\lambda}_S^w\right)^3} \\
& - 2\gamma_i \frac{\left(\frac{\lambda_i^l}{\nu^l}\right)^2 \widetilde{\lambda}_s}{\left(\widetilde{\lambda}_S^w\right)^3}
\end{aligned}$$

Note that the first and last elements in (EC.3) are negative, while all other terms vanish as the demand rates increase. Thus,  $\frac{\partial^2 \Pi_i^S}{(\partial w_i^l)^2} < 0$  when the demand volumes  $\{\lambda_i^m\}$  are sufficiently large.

$$\begin{aligned}
\frac{\partial^2 \pi_i^S}{\partial w_i^l \partial w_i^k} & = -\gamma_i \frac{\left(a_i^{l'}\right) \left(a_i^{k'}\right) \left(\frac{w_i^k}{\nu^l} - \frac{w_i^l}{\nu^k}\right) \left(\widetilde{\lambda}_S^w\right) - 2w_i^k \sum_{m \in S} \frac{\lambda_i^m}{\nu^m} \left(\frac{w_i^m}{\nu^l} - \frac{w_i^l}{\nu^m}\right)}{\nu^l \nu^k \left(\widetilde{\lambda}_S^w\right)^3} \\
& - \gamma_i \frac{\left(a_i^{l'}\right) \frac{\lambda_i^k}{\nu^l} \left(\widetilde{\lambda}_S^w\right) - 2\lambda_i^k \sum_{m \in S} \frac{\lambda_i^m}{\nu^m} \left(\frac{w_i^m}{\nu^l} - \frac{w_i^l}{\nu^m}\right)}{\nu^l \nu^k \left(\widetilde{\lambda}_S^w\right)^3} \\
& + \gamma_i \left(a_i^{l'}\right) \frac{\frac{\lambda_i^l}{\nu^l (\nu^k)^2} \left(\widetilde{\lambda}_S^w\right) - 2 \frac{w_i^k \lambda_i^l}{\nu^k \nu^l} \sum_{m \in S} \frac{\lambda_i}{(\nu^m)^2}}{\left(\widetilde{\lambda}_S^w\right)^3} \\
& - 2\gamma_i \frac{\left(\frac{\lambda_i^l}{\nu^l}\right) \left(\frac{\lambda_i^k}{\nu^k}\right) \widetilde{\lambda}_s}{\left(\widetilde{\lambda}_S^w\right)^3}.
\end{aligned}$$

Thus,

$$-\left|\frac{\partial^2 \pi_i^S}{\partial (w_i^l)^2}\right| + \sum_{k \neq l} \left|\frac{\partial^2 \pi_i^S}{\partial w_i^l \partial w_i^k}\right| < a_i^{l''} \left(p_i^l - c_i^l - \frac{\gamma_i}{\nu^l}\right) + 2\gamma_i \frac{\frac{\lambda_i^l}{\nu^l} \left(\sum_{m \in S} \frac{\lambda_i^m}{\nu^m} - 2\frac{\lambda_i^l}{\nu^l}\right) \widetilde{\lambda}_s}{\left(\widetilde{\lambda}_S^w\right)^3} + o(\lambda). \quad (\text{EC.4})$$

If  $\frac{\lambda_i^l}{\nu^l} \geq \frac{1}{2} \sum_{m \in S} \frac{\lambda_i^m}{\nu^m}$ , this expression is strictly negative for sufficiently large  $\lambda$ . If  $\frac{\lambda_i^l}{\nu^l} \leq \frac{1}{2} \sum_{m \in S} \frac{\lambda_i^m}{\nu^m}$ , the right hand side of (EC.4) can be bounded by  $a_i^{l''} \left(p_i^l - c_i^l - \frac{\gamma_i}{\nu^l}\right) + \frac{2\gamma_i}{(\underline{w}_i)^2 (\underline{w}\nu)_i} \frac{\frac{\lambda_i^l}{\nu^l} \left(\Lambda - 2\frac{\lambda_i^l}{\nu^l}\right)}{\Lambda^2} + o(\lambda)$ , where  $\Lambda = \sum_{m \in S} \frac{\lambda_i^m}{\nu^m}$ . For fixed  $\Lambda$  this expression is bounded from above by  $a_i^{l''} \left(p_i^l - c_i^l - \frac{\gamma_i}{\nu^l}\right) + \frac{\gamma_i}{4(\underline{w}_i)^3 \underline{\nu}_i} + o(\lambda)$  which

is strictly negative in view of the lower bound for  $\underline{w}_i$  ■

**Proof of Proposition 5.2:** Assume to the contrary that for some  $i = 1, \dots, N$ ,  $S_i^* \subsetneq E$  is the bottleneck set of customer classes. Let  $l \notin S_i^*$ . By (3) and the fact that  $w^*$  is an interior point of the feasible region, it is possible to reduce  $w_i^*$  without incurring any additional capacity costs, while increasing the firm's variable profits as given by the first term in (7). This contradicts the fact that  $w^*$  is a Nash equilibrium. The conclusion regarding the firms' priority rules is immediate from Corollary 4.2(c). ■

**Proof of Proposition 5.3:**

(a) Since  $w_i^*$  is an interior point of the feasible waiting time region, it follows from Proposition 5.2 that  $\pi_i(w^*) = \pi_i^E(w^*)$ , and  $0 = \frac{\partial \pi_i^*}{\partial w_i^*} = \frac{\partial \pi_i^E}{\partial w_i^*}$ . Using (EC.2) and adding  $\frac{\gamma_i}{(w_i^*)^2}$  to both sides of the equation, we obtain after some algebra that

$$a_i^{l'} \left( p_i^l - c_i^l - \frac{\gamma_i}{\nu^l} \right) + \frac{\gamma_i}{(w_i^*)^2} = \gamma_i a_i^{l'} \frac{\frac{1}{(\nu^l)^2} \widetilde{\lambda}_E^w - \frac{w_i^*}{\nu^l} \widetilde{\lambda}}{\left( \widetilde{\lambda}_E^w \right)^2} + \left[ \frac{\gamma_i}{(w_i^*)^2} - \gamma_i \frac{\frac{\lambda_i^l}{\nu^l} \widetilde{\lambda}}{\left( \widetilde{\lambda}_E^w \right)^2} \right] \quad (\text{EC.5})$$

where  $\widetilde{\lambda}_S^w = \sum_{m \in S} \frac{\lambda_i^m w_i^m}{\nu^m}$ . Since  $a_i^l(\cdot)$  is decreasing, and  $\frac{w_i^* \nu^l}{W_i(E)} \leq 1$ , the first term to the right of (EC.5) is negative. The lower bound for  $\nu^l w_i^*$  is equivalent to  $\frac{1}{(w_i^*)^2} = \frac{(\nu^l)^2}{(w_i^* \nu^l)^2} \leq \frac{\lambda_i^l}{\lambda} \frac{1}{(W_i(E))^2} = \frac{\lambda_i^l}{\nu^l} \left( \frac{\widetilde{\lambda}}{\widetilde{\lambda}_E^w} \right)^2 = \frac{\lambda_i^l \widetilde{\lambda}_S}{\left( \widetilde{\lambda}_S^w \right)^2}$ , which in turn is equivalent to the second term to the right of (EC.5) being negative as well. We conclude that  $w_i^{*l}$  satisfies the equation

$$a_i^{l'} \left( p_i^l - c_i^l - \frac{\gamma_i}{\nu^l} \right) = R - \frac{\gamma_i}{(w_i^*)^2} \quad (\text{EC.6})$$

where  $R \leq 0$ , while class  $l$ 's equilibrium waiting time under dedicated service is easily verified to satisfy  $a_i^{l'} \left( p_i^l - c_i^l - \frac{\gamma_i}{\nu^l} \right) = -\frac{\gamma_i}{(w_i^*)^2}$ . The solution of (EC.6) is the (at most unique) intersection of a decreasing and an increasing function, and it is decreasing in  $R$ ; thus,  $w_i^{*l} \leq w_i^{Dl}$ .

(b) The proof of part (b) is analogous.

(c) Immediate from the fact that the system of equations (EC.6) decomposes on a firm by firm basis. ■

**Proof of Theorem 5.3:**

(a) As in the proof of Theorem 5.2, one verifies that, for all  $S \subseteq E$   $\pi_i^S$  is jointly concave in  $(p_i^1, \dots, p_i^J)$

and  $(w_i^1, \dots, w_i^J)$ , by verifying that the Hessian is dominant diagonal. The analysis is analogous to that of Theorem 5.2, noting that  $\frac{\partial^2 \pi_i^S}{\partial p_i^l \partial w_i^k} = o(\lambda)$  for  $k \neq l$ , while  $\frac{\partial^2 \pi_i^S}{\partial p_i^l \partial w_i^l} = \frac{da_i^l(w_i^l)}{dw_i^l} + o(\lambda)$ .

(b) Analogous to the proof of Proposition 5.2. ■

### Proof of Theorem 6.1:

The proof proceeds in close similarity to that of Theorem 5.1. Once again, it suffices to show that each of the functions  $\pi_i^S(p)$ , given by (12) is jointly concave in the vector  $\{p_i^1, \dots, p_i^J\}$ , as long as all  $\{\lambda_i^m\}$  are in excess of certain minimal threshold values  $\{\underline{\lambda}_i^m\}$ .

$$\frac{\partial \pi_i^S}{\partial p_i^l} = \lambda_i^l - b_i^l(p_i^l - c_i^l) + \sum_{m \neq l} \varphi_{ii}^{ml} - \gamma_i \sum_{m \in S} \frac{\lambda_i^m}{\partial p_i^l \nu^m} \left\{ \frac{\sum_{n \in S} \frac{\lambda_i^n w_i^n}{\nu^n \nu^m} - w_i^m \sum_{n \in S} \frac{\lambda_i^n}{\nu^n} + 1}{(\widetilde{\lambda}_i^w)^2} \right\}$$

where  $\widetilde{\lambda}_i^w = \sum_{n \in S} \frac{\lambda_i^n w_i^n}{\nu^n}$ . Thus,

$$\frac{\partial \pi_i^S}{(\partial p_i^l)^2} = 2b_i^l + \delta_{ii}^{ll} \quad \frac{\partial \pi_i^S}{\partial p_i^l \partial p_i^k} = \varphi_{ii}^{lk} + \delta_{ii}^{lk}$$

, where

$$\delta_{ii}^{ll} = \gamma_i \frac{\partial \left\{ \sum_{m \in S} \frac{\lambda_i^m}{\partial p_i^l \nu^m} \left[ \frac{\sum_{n \in S} \frac{\lambda_i^n w_i^n}{\nu^n \nu^m} - w_i^m \sum_{n \in S} \frac{\lambda_i^n}{\nu^n} \right] \right\}}{\partial p_i^l} \quad \delta_{ii}^{lk} = \gamma_i \frac{\partial \left\{ \sum_{m \in S} \frac{\lambda_i^m}{\partial p_i^l \nu^m} \left[ \frac{\sum_{n \in S} \frac{\lambda_i^n w_i^n}{\nu^n \nu^m} - w_i^m \sum_{n \in S} \frac{\lambda_i^n}{\nu^n} \right] \right\}}{\partial p_i^k}$$

As in the proof of Theorem 5.1, it is possible to show that for any  $\epsilon \leq 0$ ,  $|\delta_{ii}^{ll}| \leq \epsilon$  and  $|\delta_{ii}^{lk}| \leq \epsilon$  as long as the minimal demand volumes  $\{\underline{\lambda}_i^m\}$  are sufficiently large. Invoking condition  $(D^q)$  this implies that the Hessian of the function  $\pi_i^S$  has a negative diagonal and it is diagonally dominant, ensuring that it is semi-negative definite. This completes the proof that the function  $\pi_i^S$  is jointly concave. ■
